# Supplementary material
Source: publisher figshare collection journal article supplement (https://acs.figshare.com/ndownloader/files/9636322)
Supplement: Supplementary file 1 [file 9636322]

  
data_shirel3 

_audit_creation_method            SHELXL-97 
_chemical_name_systematic 
; 
 ? 
; 

# start Validation Reply Form
_vrf_PLAT430_I
;
PROBLEM: Short Inter D...A Contact  O2     ..  O3      ..       2.48 Ang. 
RESPONSE: The short distance O2-O3 is do to the sharing of double hydrogen
	bond between the 2 carboxylic groups (C18(O3)(O4) & (C17(O1)(O2)).
	No real contact - O4w has half occupancy only.
;
_vrf_PLAT430_I.1
;
PROBLEM: Short Inter D...A Contact  O4W    ..  O4W     ..       1.86 Ang.  
RESPONSE:  No real contact - O4w has half occupancy only.
;

# end Validation Reply Form

_chemical_name_common             ? 
_chemical_melting_point           ? 
_chemical_formula_moiety          'C44 H32 Cl Ir N O4 P2, 3(O)'
_chemical_formula_sum 		'C44 H32 Cl Ir N O7 P2' 
_chemical_formula_weight          976.30 
  
loop_ 
 _atom_type_symbol 
 _atom_type_description 
 _atom_type_scat_dispersion_real 
 _atom_type_scat_dispersion_imag 
 _atom_type_scat_source 
 'C'  'C'   0.0033   0.0016 
 'International Tables Vol C Tables 4.2.6.8 and 6.1.1.4' 
 'H'  'H'   0.0000   0.0000 
 'International Tables Vol C Tables 4.2.6.8 and 6.1.1.4' 
 'N'  'N'   0.0061   0.0033 
 'International Tables Vol C Tables 4.2.6.8 and 6.1.1.4' 
 'O'  'O'   0.0106   0.0060 
 'International Tables Vol C Tables 4.2.6.8 and 6.1.1.4' 
 'P'  'P'   0.1023   0.0942 
 'International Tables Vol C Tables 4.2.6.8 and 6.1.1.4' 
 'Cl'  'Cl'   0.1484   0.1585 
 'International Tables Vol C Tables 4.2.6.8 and 6.1.1.4' 
 'Ir'  'Ir'  -1.4442   7.9887 
 'International Tables Vol C Tables 4.2.6.8 and 6.1.1.4' 
  
_symmetry_cell_setting            Monoclinic 
_symmetry_space_group_name_H-M    P2(1)/c 
_symmetry_space_group_name_Hall   '-P 2ybc'
  
loop_ 
 _symmetry_equiv_pos_as_xyz 
 'x, y, z' 
 '-x, y+1/2, -z+1/2' 
 '-x, -y, -z' 
 'x, -y-1/2, z-1/2' 
  
_cell_length_a                    13.554(2) 
_cell_length_b                    25.997(4) 
_cell_length_c                    13.478(2) 
_cell_angle_alpha                 90.00 
_cell_angle_beta                  108.116(2) 
_cell_angle_gamma                 90.00 
_cell_volume                      4513.8(1) 
_cell_formula_units_Z             4 
_cell_measurement_temperature     173(1) 
_cell_measurement_reflns_used     7817 
_cell_measurement_theta_min       2.229 
_cell_measurement_theta_max       27.863
  
_exptl_crystal_description        plate 
_exptl_crystal_colour             colorless 
_exptl_crystal_size_max           0.26 
_exptl_crystal_size_mid           0.15 
_exptl_crystal_size_min           0.10 
_exptl_crystal_density_meas       ? 
_exptl_crystal_density_diffrn     1.437 
_exptl_crystal_density_method     'not measured' 
_exptl_crystal_F_000              1932 
_exptl_absorpt_coefficient_mu     3.134 
_exptl_absorpt_correction_type    'multi-scan'
_exptl_absorpt_correction_T_min   0.4962 
_exptl_absorpt_correction_T_max   0.7446 
_exptl_absorpt_process_details    'Bruker SADABS V2.05' 
  
_exptl_special_details 
; 
 ? 
; 
  
_diffrn_ambient_temperature       173(1) 
_diffrn_radiation_wavelength      0.71073 
_diffrn_radiation_type            MoK\a 
_diffrn_radiation_source          'fine-focus sealed tube' 
_diffrn_radiation_monochromator   graphite 
_diffrn_measurement_device_type   'CCD area detector' 
_diffrn_measurement_method        'phi and omega scans' 
_diffrn_detector_area_resol_mean  ? 
_diffrn_standards_number          ? 
_diffrn_standards_interval_count  ? 
_diffrn_standards_interval_time   ? 
_diffrn_standards_decay_%         ? 
_diffrn_reflns_number             51829 
_diffrn_reflns_av_R_equivalents   0.0465 
_diffrn_reflns_av_sigmaI/netI     0.0387 
_diffrn_reflns_limit_h_min        -17 
_diffrn_reflns_limit_h_max        17 
_diffrn_reflns_limit_k_min        -33 
_diffrn_reflns_limit_k_max        33 
_diffrn_reflns_limit_l_min        -17 
_diffrn_reflns_limit_l_max        17 
_diffrn_reflns_theta_min          2.23 
_diffrn_reflns_theta_max          28.02 
_reflns_number_total              10780 
_reflns_number_gt                 10426 
_reflns_threshold_expression      >2sigma(I) 
  
_computing_data_collection        'Bruker SMART' 
_computing_cell_refinement        'Bruker SMART' 
_computing_data_reduction         'Bruker SAINT' 
_computing_structure_solution     'SHELXS-97 (Sheldrick, 1990)' 
_computing_structure_refinement   'SHELXL-97 (Sheldrick, 1997)' 
_computing_molecular_graphics     'Bruker SHELXTL' 
_computing_publication_material   'Bruker SHELXTL' 
  
_refine_special_details 
; 
 Refinement of F^2^ against ALL reflections.  The weighted R-factor wR and 
 goodness of fit S are based on F^2^, conventional R-factors R are based 
 on F, with F set to zero for negative F^2^. The threshold expression of 
 F^2^ > 2sigma(F^2^) is used only for calculating R-factors(gt) etc. and is 
 not relevant to the choice of reflections for refinement.  R-factors based 
 on F^2^ are statistically about twice as large as those based on F, and R- 
 factors based on ALL data will be even larger. 
; 
  
_refine_ls_structure_factor_coef  Fsqd 
_refine_ls_matrix_type            full 
_refine_ls_weighting_scheme       calc 
_refine_ls_weighting_details 
 'calc w=1/[\s^2^(Fo^2^)+(0.0525P)^2^+62.6021P] where P=(Fo^2^+2Fc^2^)/3' 
_atom_sites_solution_primary      direct 
_atom_sites_solution_secondary    difmap 
_atom_sites_solution_hydrogens    geom 
_refine_ls_hydrogen_treatment     constr
_refine_ls_extinction_method      none 
_refine_ls_extinction_coef        ? 
_refine_ls_number_reflns          10780 
_refine_ls_number_parameters      509 
_refine_ls_number_restraints      0 
_refine_ls_R_factor_all           0.0820 
_refine_ls_R_factor_gt            0.0787 
_refine_ls_wR_factor_ref          0.1765 
_refine_ls_wR_factor_gt           0.1748 
_refine_ls_goodness_of_fit_ref    1.304 
_refine_ls_restrained_S_all       1.304 
_refine_ls_shift/su_max           0.005 
_refine_ls_shift/su_mean          0.000 
  
loop_ 
 _atom_site_label 
 _atom_site_type_symbol 
 _atom_site_fract_x 
 _atom_site_fract_y 
 _atom_site_fract_z 
 _atom_site_U_iso_or_equiv 
 _atom_site_adp_type 
 _atom_site_occupancy 
 _atom_site_symmetry_multiplicity 
 _atom_site_calc_flag 
 _atom_site_refinement_flags 
 _atom_site_disorder_assembly 
 _atom_site_disorder_group 
O3W O -0.186(3) 0.7469(16) 0.497(3) 0.158(15) Uiso 0.50 1 d P . . 
C1 C 0.2036(6) 0.6185(3) 0.5928(6) 0.0139(14) Uani 1 1 d . . . 
C2 C 0.1016(6) 0.5921(3) 0.5861(6) 0.0157(15) Uani 1 1 d . . . 
C3 C 0.0833(6) 0.5673(3) 0.6694(6) 0.0176(15) Uani 1 1 d . . . 
C4 C -0.0149(7) 0.5455(3) 0.6558(7) 0.0223(17) Uani 1 1 d . . . 
H4 H -0.0301 0.5301 0.7133 0.027 Uiso 1 1 calc R . . 
C5 C -0.0896(7) 0.5465(3) 0.5585(7) 0.0244(18) Uani 1 1 d . . . 
H5 H -0.1553 0.5309 0.5488 0.029 Uiso 1 1 calc R . . 
C6 C -0.0682(6) 0.5705(3) 0.4742(7) 0.0226(17) Uani 1 1 d . . . 
H6 H -0.1194 0.5709 0.4075 0.027 Uiso 1 1 calc R . . 
C7 C 0.0267(6) 0.5935(3) 0.4877(6) 0.0163(15) Uani 1 1 d . . . 
C8 C 0.0640(6) 0.6223(3) 0.4075(6) 0.0196(15) Uani 1 1 d . . . 
H8 H 0.0114 0.6219 0.3365 0.024 Uiso 1 1 calc R . . 
C9 C 0.1639(6) 0.5948(3) 0.4096(6) 0.0181(15) Uani 1 1 d . . . 
C10 C 0.1830(7) 0.5674(3) 0.3290(6) 0.0230(17) Uani 1 1 d . . . 
H10 H 0.1351 0.5685 0.2605 0.028 Uiso 1 1 calc R . . 
C11 C 0.2740(8) 0.5382(4) 0.3505(7) 0.0279(19) Uani 1 1 d . . . 
H11 H 0.2877 0.5197 0.2955 0.033 Uiso 1 1 calc R . . 
C12 C 0.3448(7) 0.5356(3) 0.4504(7) 0.0251(18) Uani 1 1 d . . . 
H12 H 0.4052 0.5149 0.4636 0.030 Uiso 1 1 calc R . . 
C13 C 0.3264(6) 0.5636(3) 0.5308(6) 0.0188(15) Uani 1 1 d . . . 
C14 C 0.2369(6) 0.5932(3) 0.5090(6) 0.0151(14) Uani 1 1 d . . . 
C15 C 0.1743(6) 0.6754(3) 0.5589(6) 0.0160(15) Uani 1 1 d . . . 
H15 H 0.2375 0.6918 0.5494 0.019 Uiso 1 1 calc R . . 
C16 C 0.0879(6) 0.6781(3) 0.4521(6) 0.0187(15) Uani 1 1 d . . . 
H16 H 0.0238 0.6919 0.4642 0.022 Uiso 1 1 calc R . . 
C17 C 0.1553(7) 0.7012(3) 0.6528(6) 0.0209(16) Uani 1 1 d . . . 
C18 C 0.1157(7) 0.7134(3) 0.3750(7) 0.0234(17) Uani 1 1 d . . . 
C20 C 0.1441(7) 0.6015(4) 0.8835(6) 0.0244(18) Uani 1 1 d . . . 
C21 C 0.0557(8) 0.6322(4) 0.8504(10) 0.039(2) Uani 1 1 d . . . 
H21 H 0.0213 0.6374 0.7781 0.047 Uiso 1 1 calc R . . 
C22 C 0.0185(11) 0.6554(5) 0.9261(12) 0.059(4) Uani 1 1 d . . . 
H22 H -0.0420 0.6763 0.9055 0.071 Uiso 1 1 calc R . . 
C23 C 0.0711(13) 0.6475(5) 1.0317(11) 0.061(4) Uani 1 1 d . . . 
H23 H 0.0458 0.6630 1.0829 0.073 Uiso 1 1 calc R . . 
C24 C 0.1576(13) 0.6181(5) 1.0621(10) 0.057(4) Uani 1 1 d . . . 
H24 H 0.1934 0.6140 1.1344 0.069 Uiso 1 1 calc R . . 
C25 C 0.1950(9) 0.5939(4) 0.9894(7) 0.037(2) Uani 1 1 d . . . 
H25 H 0.2545 0.5723 1.0115 0.044 Uiso 1 1 calc R . . 
C26 C 0.2302(7) 0.5075(3) 0.8377(6) 0.0220(17) Uani 1 1 d . . . 
C27 C 0.1608(8) 0.4670(4) 0.8199(8) 0.031(2) Uani 1 1 d . . . 
H27 H 0.0910 0.4719 0.7772 0.038 Uiso 1 1 calc R . . 
C28 C 0.1924(9) 0.4190(4) 0.8641(9) 0.041(3) Uani 1 1 d . . . 
H28 H 0.1444 0.3912 0.8509 0.049 Uiso 1 1 calc R . . 
C29 C 0.2933(10) 0.4114(4) 0.9272(9) 0.044(3) Uani 1 1 d . . . 
H29 H 0.3146 0.3785 0.9569 0.053 Uiso 1 1 calc R . . 
C30 C 0.3632(9) 0.4518(4) 0.9470(8) 0.041(3) Uani 1 1 d . . . 
H30 H 0.4324 0.4467 0.9911 0.049 Uiso 1 1 calc R . . 
C31 C 0.3324(7) 0.5001(4) 0.9024(7) 0.030(2) Uani 1 1 d . . . 
H31 H 0.3806 0.5277 0.9158 0.035 Uiso 1 1 calc R . . 
C32 C 0.5333(6) 0.5838(3) 0.6822(7) 0.0225(17) Uani 1 1 d . . . 
C33 C 0.5673(8) 0.5908(4) 0.5972(9) 0.035(2) Uani 1 1 d . . . 
H33 H 0.5202 0.5866 0.5288 0.042 Uiso 1 1 calc R . . 
C34 C 0.6697(9) 0.6039(5) 0.6103(10) 0.042(3) Uani 1 1 d . . . 
H34 H 0.6922 0.6079 0.5506 0.051 Uiso 1 1 calc R . . 
C35 C 0.7391(8) 0.6113(5) 0.7076(10) 0.045(3) Uani 1 1 d . . . 
H35 H 0.8106 0.6178 0.7182 0.054 Uiso 1 1 calc R . . 
C36 C 0.7003(7) 0.6086(3) 0.7847(10) 0.036(3) Uani 1 1 d . . . 
H36 H 0.7451 0.6179 0.8517 0.043 Uiso 1 1 calc R . . 
C37 C 0.6022(8) 0.5938(4) 0.7793(9) 0.037(2) Uani 1 1 d . . . 
H37 H 0.5822 0.5905 0.8405 0.044 Uiso 1 1 calc R . . 
C38 C 0.4203(7) 0.4946(3) 0.7014(7) 0.0241(17) Uani 1 1 d . . . 
C39 C 0.5132(8) 0.4747(4) 0.7659(10) 0.041(3) Uani 1 1 d . . . 
H39 H 0.5706 0.4971 0.7936 0.050 Uiso 1 1 calc R . . 
C40 C 0.5242(9) 0.4228(4) 0.7909(12) 0.055(3) Uani 1 1 d . . . 
H40 H 0.5879 0.4100 0.8363 0.065 Uiso 1 1 calc R . . 
C41 C 0.4430(11) 0.3906(4) 0.7498(11) 0.053(3) Uani 1 1 d . . . 
H41 H 0.4507 0.3549 0.7658 0.064 Uiso 1 1 calc R . . 
C42 C 0.3484(9) 0.4089(4) 0.6847(9) 0.041(3) Uani 1 1 d . . . 
H42 H 0.2919 0.3861 0.6564 0.049 Uiso 1 1 calc R . . 
C43 C 0.3380(8) 0.4614(4) 0.6615(8) 0.032(2) Uani 1 1 d . . . 
H43 H 0.2736 0.4743 0.6178 0.038 Uiso 1 1 calc R . . 
C1AC C 0.4641(8) 0.7008(4) 0.6840(9) 0.034(2) Uani 1 1 d . . . 
C2AC C 0.5510(10) 0.7324(5) 0.6719(12) 0.058(4) Uani 1 1 d . . . 
H2A1 H 0.5898 0.7474 0.7394 0.087 Uiso 1 1 calc R . . 
H2A2 H 0.5231 0.7599 0.6213 0.087 Uiso 1 1 calc R . . 
H2A3 H 0.5973 0.7106 0.6469 0.087 Uiso 1 1 calc R . . 
Cl1 Cl 0.42462(16) 0.63357(8) 0.92095(16) 0.0255(4) Uani 1 1 d . . . 
Ir1 Ir 0.30949(2) 0.621242(11) 0.73803(2) 0.01529(10) Uani 1 1 d . . . 
N1AC N 0.4046(6) 0.6747(3) 0.6972(5) 0.0237(15) Uani 1 1 d . . . 
O1 O 0.2121(5) 0.6829(3) 0.7429(5) 0.0313(15) Uani 1 1 d . . . 
O2 O 0.0887(5) 0.7374(2) 0.6397(5) 0.0293(14) Uani 1 1 d . . . 
O3 O 0.0581(6) 0.7094(3) 0.2802(5) 0.043(2) Uani 1 1 d . . . 
O4 O 0.1850(8) 0.7449(4) 0.4038(6) 0.071(3) Uani 1 1 d . . . 
O1W O 0.3437(8) 0.7936(4) 0.5720(8) 0.064(3) Uani 1 1 d . . . 
P1 P 0.19417(16) 0.57201(8) 0.78614(14) 0.0162(4) Uani 1 1 d . . . 
P2 P 0.40104(16) 0.56283(8) 0.67052(17) 0.0187(4) Uani 1 1 d . . . 
O2WA O 0.3618(15) 0.8069(7) 0.812(2) 0.092(7) Uani 0.60 1 d P . . 
O4W O 0.9481(18) 0.5101(9) 0.9397(18) 0.076(6) Uiso 0.50 1 d P . . 
O2WB O 0.523(3) 0.7844(13) 0.908(3) 0.094(10) Uiso 0.40 1 d P . . 
  
loop_ 
 _atom_site_aniso_label 
 _atom_site_aniso_U_11 
 _atom_site_aniso_U_22 
 _atom_site_aniso_U_33 
 _atom_site_aniso_U_23 
 _atom_site_aniso_U_13 
 _atom_site_aniso_U_12 
C1 0.020(4) 0.011(3) 0.011(3) 0.010(3) 0.006(3) 0.004(3) 
C2 0.022(4) 0.010(3) 0.018(4) -0.001(3) 0.010(3) 0.005(3) 
C3 0.019(4) 0.021(4) 0.014(4) 0.001(3) 0.006(3) 0.002(3) 
C4 0.025(4) 0.024(4) 0.019(4) 0.007(3) 0.007(3) 0.003(3) 
C5 0.021(4) 0.028(4) 0.024(4) 0.005(3) 0.005(3) -0.007(3) 
C6 0.019(4) 0.026(4) 0.020(4) -0.001(3) 0.003(3) -0.005(3) 
C7 0.021(4) 0.016(4) 0.014(3) 0.000(3) 0.009(3) 0.003(3) 
C8 0.026(4) 0.019(4) 0.013(3) 0.002(3) 0.005(3) -0.004(3) 
C9 0.023(4) 0.017(4) 0.015(4) 0.004(3) 0.009(3) -0.003(3) 
C10 0.029(4) 0.027(4) 0.014(4) 0.001(3) 0.008(3) -0.005(3) 
C11 0.036(5) 0.028(5) 0.023(4) -0.005(4) 0.013(4) -0.002(4) 
C12 0.021(4) 0.027(4) 0.030(5) -0.002(4) 0.012(4) 0.007(3) 
C13 0.020(4) 0.021(4) 0.017(4) -0.002(3) 0.008(3) -0.002(3) 
C14 0.021(4) 0.007(3) 0.020(4) 0.000(3) 0.011(3) -0.002(3) 
C15 0.022(4) 0.017(4) 0.009(3) 0.000(3) 0.005(3) -0.002(3) 
C16 0.024(4) 0.017(4) 0.014(4) 0.000(3) 0.005(3) 0.000(3) 
C17 0.028(4) 0.017(4) 0.016(4) 0.001(3) 0.006(3) 0.001(3) 
C18 0.029(4) 0.022(4) 0.017(4) 0.002(3) 0.003(3) -0.003(3) 
C20 0.035(5) 0.030(4) 0.011(4) 0.000(3) 0.010(3) -0.002(4) 
C21 0.035(5) 0.025(5) 0.059(7) -0.004(5) 0.015(5) 0.005(4) 
C22 0.063(8) 0.055(8) 0.075(10) -0.023(7) 0.044(8) -0.002(6) 
C23 0.094(11) 0.048(7) 0.062(9) -0.033(7) 0.056(9) -0.024(7) 
C24 0.094(11) 0.054(8) 0.032(6) -0.012(5) 0.031(7) -0.029(8) 
C25 0.055(7) 0.040(6) 0.018(4) -0.002(4) 0.014(4) -0.015(5) 
C26 0.029(4) 0.017(4) 0.019(4) 0.006(3) 0.006(3) 0.001(3) 
C27 0.028(5) 0.029(5) 0.032(5) 0.004(4) 0.002(4) -0.004(4) 
C28 0.043(6) 0.028(5) 0.049(6) 0.010(5) 0.011(5) -0.006(4) 
C29 0.063(8) 0.023(5) 0.040(6) 0.017(4) 0.009(5) 0.007(5) 
C30 0.042(6) 0.040(6) 0.031(5) 0.010(4) -0.003(4) 0.005(5) 
C31 0.026(5) 0.028(5) 0.028(5) 0.005(4) -0.001(4) -0.006(4) 
C32 0.014(4) 0.015(4) 0.039(5) -0.006(3) 0.009(3) 0.000(3) 
C33 0.028(5) 0.039(6) 0.039(6) -0.002(4) 0.014(4) -0.001(4) 
C34 0.039(6) 0.050(6) 0.048(6) -0.005(5) 0.028(5) -0.007(5) 
C35 0.027(5) 0.053(7) 0.060(7) -0.012(6) 0.020(5) -0.006(5) 
C36 0.025(5) 0.010(4) 0.075(8) -0.007(4) 0.017(5) -0.001(3) 
C37 0.027(5) 0.042(6) 0.041(6) -0.005(5) 0.011(4) -0.007(4) 
C38 0.026(4) 0.022(4) 0.027(4) 0.005(3) 0.011(4) 0.006(3) 
C39 0.029(5) 0.033(5) 0.058(7) 0.006(5) 0.008(5) 0.007(4) 
C40 0.037(6) 0.032(6) 0.085(10) 0.021(6) 0.005(6) 0.009(5) 
C41 0.064(8) 0.020(5) 0.077(9) 0.010(5) 0.022(7) 0.013(5) 
C42 0.054(7) 0.021(5) 0.044(6) -0.001(4) 0.012(5) -0.004(4) 
C43 0.036(5) 0.027(5) 0.030(5) 0.000(4) 0.007(4) -0.003(4) 
C1AC 0.040(6) 0.025(5) 0.042(6) 0.000(4) 0.018(5) 0.006(4) 
C2AC 0.049(7) 0.050(7) 0.086(10) -0.010(7) 0.037(7) -0.020(6) 
Cl1 0.0267(10) 0.0271(10) 0.0176(9) 0.0007(8) -0.0005(8) 0.0017(8) 
Ir1 0.01802(15) 0.01381(15) 0.01312(15) 0.00011(11) 0.00353(10) 0.00027(11) 
N1AC 0.031(4) 0.025(4) 0.013(3) 0.002(3) 0.004(3) -0.001(3) 
O1 0.041(4) 0.030(3) 0.022(3) 0.001(3) 0.008(3) 0.007(3) 
O2 0.042(4) 0.026(3) 0.015(3) -0.004(2) 0.003(3) 0.013(3) 
O3 0.052(5) 0.048(4) 0.017(3) 0.010(3) -0.006(3) -0.025(4) 
O4 0.084(7) 0.083(7) 0.029(4) 0.024(4) -0.010(4) -0.057(6) 
O1W 0.071(6) 0.056(6) 0.054(6) 0.016(5) 0.002(5) -0.002(5) 
P1 0.0194(9) 0.0197(10) 0.0080(8) 0.0040(7) 0.0022(7) 0.0041(8) 
P2 0.0166(9) 0.0173(10) 0.0207(10) -0.0034(8) 0.0036(8) -0.0019(7) 
O2WA 0.068(12) 0.048(10) 0.17(2) -0.002(12) 0.057(14) -0.020(9) 
  
_geom_special_details 
; 
 All esds (except the esd in the dihedral angle between two l.s. planes) 
 are estimated using the full covariance matrix.  The cell esds are taken 
 into account individually in the estimation of esds in distances, angles 
 and torsion angles; correlations between esds in cell parameters are only 
 used when they are defined by crystal symmetry.  An approximate (isotropic) 
 treatment of cell esds is used for estimating esds involving l.s. planes. 
; 
  
loop_ 
 _geom_bond_atom_site_label_1 
 _geom_bond_atom_site_label_2 
 _geom_bond_distance 
 _geom_bond_site_symmetry_2 
 _geom_bond_publ_flag 
O3W O2 3.62(4) . ? 
C1 C14 1.492(10) . ? 
C1 C2 1.520(11) . ? 
C1 C15 1.564(10) . ? 
C1 Ir1 2.038(7) . ? 
C2 C3 1.383(11) . ? 
C2 C7 1.397(11) . ? 
C3 C4 1.405(11) . ? 
C3 P1 1.811(8) . ? 
C4 C5 1.386(12) . ? 
C4 H4 0.9500 . ? 
C5 C6 1.403(12) . ? 
C5 H5 0.9500 . ? 
C6 C7 1.378(11) . ? 
C6 H6 0.9500 . ? 
C7 C8 1.524(10) . ? 
C8 C9 1.523(12) . ? 
C8 C16 1.566(11) . ? 
C8 H8 1.0000 . ? 
C9 C10 1.389(11) . ? 
C9 C14 1.397(11) . ? 
C10 C11 1.400(13) . ? 
C10 H10 0.9500 . ? 
C11 C12 1.391(13) . ? 
C11 H11 0.9500 . ? 
C12 C13 1.392(11) . ? 
C12 H12 0.9500 . ? 
C13 C14 1.387(11) . ? 
C13 P2 1.840(8) . ? 
C15 C17 1.523(11) . ? 
C15 C16 1.549(11) . ? 
C15 H15 1.0000 . ? 
C16 C18 1.518(11) . ? 
C16 H16 1.0000 . ? 
C17 O2 1.279(10) . ? 
C17 O1 1.308(10) . ? 
C18 O4 1.216(12) . ? 
C18 O3 1.278(10) . ? 
C20 C21 1.392(14) . ? 
C20 C25 1.393(12) . ? 
C20 P1 1.823(9) . ? 
C21 C22 1.408(16) . ? 
C21 H21 0.9500 . ? 
C22 C23 1.39(2) . ? 
C22 H22 0.9500 . ? 
C23 C24 1.35(2) . ? 
C23 H23 0.9500 . ? 
C24 C25 1.386(16) . ? 
C24 H24 0.9500 . ? 
C25 H25 0.9500 . ? 
C26 C27 1.383(12) . ? 
C26 C31 1.402(12) . ? 
C26 P1 1.824(8) . ? 
C27 C28 1.392(14) . ? 
C27 H27 0.9500 . ? 
C28 C29 1.381(16) . ? 
C28 H28 0.9500 . ? 
C29 C30 1.384(16) . ? 
C29 H29 0.9500 . ? 
C30 C31 1.399(14) . ? 
C30 H30 0.9500 . ? 
C31 H31 0.9500 . ? 
C32 C33 1.375(14) . ? 
C32 C37 1.375(14) . ? 
C32 P2 1.833(8) . ? 
C33 C34 1.386(14) . ? 
C33 H33 0.9500 . ? 
C34 C35 1.368(17) . ? 
C34 H34 0.9500 . ? 
C35 C36 1.304(16) . ? 
C35 H35 0.9500 . ? 
C36 C37 1.364(13) . ? 
C36 H36 0.9500 . ? 
C37 H37 0.9500 . ? 
C38 C43 1.381(13) . ? 
C38 C39 1.389(13) . ? 
C38 P2 1.821(9) . ? 
C39 C40 1.387(15) . ? 
C39 H39 0.9500 . ? 
C40 C41 1.357(18) . ? 
C40 H40 0.9500 . ? 
C41 C42 1.393(17) . ? 
C41 H41 0.9500 . ? 
C42 C43 1.396(14) . ? 
C42 H42 0.9500 . ? 
C43 H43 0.9500 . ? 
C1AC N1AC 1.111(13) . ? 
C1AC C2AC 1.485(15) . ? 
C2AC H2A1 0.9800 . ? 
C2AC H2A2 0.9800 . ? 
C2AC H2A3 0.9800 . ? 
Cl1 Ir1 2.495(2) . ? 
Ir1 N1AC 2.081(8) . ? 
Ir1 O1 2.091(7) . ? 
Ir1 P1 2.265(2) . ? 
Ir1 P2 2.319(2) . ? 
O4 O1W 2.888(13) . ? 
O1W O2WA 3.18(3) . ? 
O2WA O2WB 2.25(4) . ? 
  
loop_ 
 _geom_angle_atom_site_label_1 
 _geom_angle_atom_site_label_2 
 _geom_angle_atom_site_label_3 
 _geom_angle 
 _geom_angle_site_symmetry_1 
 _geom_angle_site_symmetry_3 
 _geom_angle_publ_flag 
C14 C1 C2 103.9(6) . . ? 
C14 C1 C15 107.8(6) . . ? 
C2 C1 C15 105.4(6) . . ? 
C14 C1 Ir1 117.0(5) . . ? 
C2 C1 Ir1 115.4(5) . . ? 
C15 C1 Ir1 106.6(5) . . ? 
C3 C2 C7 121.5(7) . . ? 
C3 C2 C1 123.5(7) . . ? 
C7 C2 C1 115.0(7) . . ? 
C2 C3 C4 118.9(7) . . ? 
C2 C3 P1 111.4(6) . . ? 
C4 C3 P1 129.6(6) . . ? 
C5 C4 C3 119.9(8) . . ? 
C5 C4 H4 120.0 . . ? 
C3 C4 H4 120.0 . . ? 
C4 C5 C6 120.1(8) . . ? 
C4 C5 H5 120.0 . . ? 
C6 C5 H5 120.0 . . ? 
C7 C6 C5 120.4(8) . . ? 
C7 C6 H6 119.8 . . ? 
C5 C6 H6 119.8 . . ? 
C6 C7 C2 119.1(7) . . ? 
C6 C7 C8 128.4(7) . . ? 
C2 C7 C8 112.5(7) . . ? 
C9 C8 C7 104.2(6) . . ? 
C9 C8 C16 110.5(7) . . ? 
C7 C8 C16 104.9(6) . . ? 
C9 C8 H8 112.2 . . ? 
C7 C8 H8 112.2 . . ? 
C16 C8 H8 112.2 . . ? 
C10 C9 C14 119.1(8) . . ? 
C10 C9 C8 127.3(7) . . ? 
C14 C9 C8 113.1(7) . . ? 
C9 C10 C11 118.9(8) . . ? 
C9 C10 H10 120.6 . . ? 
C11 C10 H10 120.6 . . ? 
C12 C11 C10 121.7(8) . . ? 
C12 C11 H11 119.2 . . ? 
C10 C11 H11 119.2 . . ? 
C11 C12 C13 119.4(8) . . ? 
C11 C12 H12 120.3 . . ? 
C13 C12 H12 120.3 . . ? 
C14 C13 C12 118.8(8) . . ? 
C14 C13 P2 112.9(6) . . ? 
C12 C13 P2 128.1(7) . . ? 
C13 C14 C9 122.2(7) . . ? 
C13 C14 C1 122.3(7) . . ? 
C9 C14 C1 114.9(7) . . ? 
C17 C15 C16 118.6(7) . . ? 
C17 C15 C1 105.5(6) . . ? 
C16 C15 C1 111.3(6) . . ? 
C17 C15 H15 107.0 . . ? 
C16 C15 H15 107.0 . . ? 
C1 C15 H15 107.0 . . ? 
C18 C16 C15 112.7(7) . . ? 
C18 C16 C8 111.3(6) . . ? 
C15 C16 C8 108.7(6) . . ? 
C18 C16 H16 108.0 . . ? 
C15 C16 H16 108.0 . . ? 
C8 C16 H16 108.0 . . ? 
O2 C17 O1 125.6(8) . . ? 
O2 C17 C15 120.3(7) . . ? 
O1 C17 C15 114.2(7) . . ? 
O4 C18 O3 123.0(8) . . ? 
O4 C18 C16 121.4(8) . . ? 
O3 C18 C16 115.5(7) . . ? 
C21 C20 C25 120.8(9) . . ? 
C21 C20 P1 119.1(7) . . ? 
C25 C20 P1 120.1(8) . . ? 
C20 C21 C22 118.7(12) . . ? 
C20 C21 H21 120.7 . . ? 
C22 C21 H21 120.7 . . ? 
C23 C22 C21 119.5(13) . . ? 
C23 C22 H22 120.2 . . ? 
C21 C22 H22 120.2 . . ? 
C24 C23 C22 120.8(11) . . ? 
C24 C23 H23 119.6 . . ? 
C22 C23 H23 119.6 . . ? 
C23 C24 C25 121.1(12) . . ? 
C23 C24 H24 119.5 . . ? 
C25 C24 H24 119.5 . . ? 
C24 C25 C20 119.1(12) . . ? 
C24 C25 H25 120.5 . . ? 
C20 C25 H25 120.5 . . ? 
C27 C26 C31 119.4(8) . . ? 
C27 C26 P1 123.2(7) . . ? 
C31 C26 P1 117.3(7) . . ? 
C26 C27 C28 120.4(9) . . ? 
C26 C27 H27 119.8 . . ? 
C28 C27 H27 119.8 . . ? 
C29 C28 C27 120.4(10) . . ? 
C29 C28 H28 119.8 . . ? 
C27 C28 H28 119.8 . . ? 
C28 C29 C30 119.9(9) . . ? 
C28 C29 H29 120.1 . . ? 
C30 C29 H29 120.1 . . ? 
C29 C30 C31 120.2(10) . . ? 
C29 C30 H30 119.9 . . ? 
C31 C30 H30 119.9 . . ? 
C30 C31 C26 119.7(9) . . ? 
C30 C31 H31 120.1 . . ? 
C26 C31 H31 120.1 . . ? 
C33 C32 C37 117.6(8) . . ? 
C33 C32 P2 122.7(7) . . ? 
C37 C32 P2 119.7(7) . . ? 
C32 C33 C34 120.5(10) . . ? 
C32 C33 H33 119.7 . . ? 
C34 C33 H33 119.7 . . ? 
C35 C34 C33 121.2(10) . . ? 
C35 C34 H34 119.4 . . ? 
C33 C34 H34 119.4 . . ? 
C36 C35 C34 115.4(10) . . ? 
C36 C35 H35 122.3 . . ? 
C34 C35 H35 122.3 . . ? 
C35 C36 C37 126.8(12) . . ? 
C35 C36 H36 116.6 . . ? 
C37 C36 H36 116.6 . . ? 
C36 C37 C32 117.8(10) . . ? 
C36 C37 H37 121.1 . . ? 
C32 C37 H37 121.1 . . ? 
C43 C38 C39 118.4(9) . . ? 
C43 C38 P2 118.6(7) . . ? 
C39 C38 P2 123.0(8) . . ? 
C40 C39 C38 121.5(11) . . ? 
C40 C39 H39 119.2 . . ? 
C38 C39 H39 119.2 . . ? 
C41 C40 C39 119.3(11) . . ? 
C41 C40 H40 120.3 . . ? 
C39 C40 H40 120.3 . . ? 
C40 C41 C42 121.1(10) . . ? 
C40 C41 H41 119.5 . . ? 
C42 C41 H41 119.5 . . ? 
C41 C42 C43 119.0(10) . . ? 
C41 C42 H42 120.5 . . ? 
C43 C42 H42 120.5 . . ? 
C38 C43 C42 120.7(10) . . ? 
C38 C43 H43 119.6 . . ? 
C42 C43 H43 119.6 . . ? 
N1AC C1AC C2AC 174.8(12) . . ? 
C1AC C2AC H2A1 109.5 . . ? 
C1AC C2AC H2A2 109.5 . . ? 
H2A1 C2AC H2A2 109.5 . . ? 
C1AC C2AC H2A3 109.5 . . ? 
H2A1 C2AC H2A3 109.5 . . ? 
H2A2 C2AC H2A3 109.5 . . ? 
C1 Ir1 N1AC 94.5(3) . . ? 
C1 Ir1 O1 78.1(3) . . ? 
N1AC Ir1 O1 86.9(3) . . ? 
C1 Ir1 P1 85.0(2) . . ? 
N1AC Ir1 P1 172.6(2) . . ? 
O1 Ir1 P1 85.8(2) . . ? 
C1 Ir1 P2 84.4(2) . . ? 
N1AC Ir1 P2 83.2(2) . . ? 
O1 Ir1 P2 159.17(19) . . ? 
P1 Ir1 P2 104.09(8) . . ? 
C1 Ir1 Cl1 172.5(2) . . ? 
N1AC Ir1 Cl1 85.8(2) . . ? 
O1 Ir1 Cl1 94.46(19) . . ? 
P1 Ir1 Cl1 93.73(7) . . ? 
P2 Ir1 Cl1 103.02(7) . . ? 
C1AC N1AC Ir1 172.2(8) . . ? 
C17 O1 Ir1 116.4(5) . . ? 
C17 O2 O3W 133.4(9) . . ? 
C18 O4 O1W 149.2(7) . . ? 
O4 O1W O2WA 130.4(5) . . ? 
C3 P1 C20 105.0(4) . . ? 
C3 P1 C26 108.7(4) . . ? 
C20 P1 C26 103.2(4) . . ? 
C3 P1 Ir1 104.5(3) . . ? 
C20 P1 Ir1 114.4(3) . . ? 
C26 P1 Ir1 120.1(3) . . ? 
C38 P2 C32 101.7(4) . . ? 
C38 P2 C13 103.8(4) . . ? 
C32 P2 C13 107.3(4) . . ? 
C38 P2 Ir1 127.2(3) . . ? 
C32 P2 Ir1 113.6(3) . . ? 
C13 P2 Ir1 101.7(3) . . ? 
O2WB O2WA O1W 108.3(12) . . ? 
  
_diffrn_measured_fraction_theta_max    0.987 
_diffrn_reflns_theta_full              28.02 
_diffrn_measured_fraction_theta_full   0.987 
_refine_diff_density_max    2.909 
_refine_diff_density_min   -4.835 
_refine_diff_density_rms    0.221 
